# Supplementary material for: A Method of Reducing Salt Content in Fermented Soy Sauce Improves Its Flavor and Quality
Source: MDPI journal article supplement (doi:10.3390/foods13060971), 2024-03-21
Supplement: s1 [file s1]

**Table S.1** Response to interview test plan and results

| Number | A:<br>Salinity<br>(%) | B:<br>Ultrasonic<br>time<br>(min) | C:<br>Yeast<br>inoculum<br>quantity<br>(CFU/mL) | D:<br>Temperature<br>range<br>(°C) | Amino acid<br>nitrogen<br>(g/100 mL) |
|--------|-----------------------|-----------------------------------|-------------------------------------------------|------------------------------------|--------------------------------------|
| 1      | -1                    | -1                                | 0                                               | 0                                  | 0.51                                 |
| 2      | 1                     | -1                                | 0                                               | 0                                  | 0.63                                 |
| 3      | -1                    | 1                                 | 0                                               | 0                                  | 0.64                                 |
| 4      | 1                     | 1                                 | 0                                               | 0                                  | 0.57                                 |
| 5      | 0                     | 0                                 | -1                                              | -1                                 | 0.49                                 |
| 6      | 0                     | 0                                 | 1                                               | -1                                 | 0.67                                 |
| 7      | 0                     | 0                                 | -1                                              | 1                                  | 0.56                                 |
| 8      | 0                     | 0                                 | 1                                               | 1                                  | 0.68                                 |
| 9      | -1                    | 0                                 | 0                                               | -1                                 | 0.55                                 |
| 10     | 1                     | 0                                 | 0                                               | -1                                 | 0.48                                 |
| 11     | -1                    | 0                                 | 0                                               | 1                                  | 0.54                                 |
| 12     | 1                     | 0                                 | 0                                               | 1                                  | 0.52                                 |
| 13     | 0                     | -1                                | -1                                              | 0                                  | 0.52                                 |
| 14     | 0                     | 1                                 | -1                                              | 0                                  | 0.51                                 |
| 15     | 0                     | -1                                | 1                                               | 0                                  | 0.56                                 |
| 16     | 0                     | 1                                 | 1                                               | 0                                  | 0.62                                 |
| 17     | -1                    | 0                                 | -1                                              | 0                                  | 0.56                                 |
| 18     | 1                     | 0                                 | -1                                              | 0                                  | 0.51                                 |
| 19     | -1                    | 0                                 | 1                                               | 0                                  | 0.62                                 |
| 20     | 1                     | 0                                 | 1                                               | 0                                  | 0.67                                 |
| 21     | 0                     | -1                                | 0                                               | -1                                 | 0.52                                 |
| 22     | 0                     | 1                                 | 0                                               | -1                                 | 0.61                                 |
| 23     | 0                     | -1                                | 0                                               | 1                                  | 0.66                                 |
| 24     | 0                     | 1                                 | 0                                               | 1                                  | 0.67                                 |
| 25     | 0                     | 0                                 | 0                                               | 0                                  | 0.85                                 |
| 26     | 0                     | 0                                 | 0                                               | 0                                  | 0.78                                 |
| 27     | 0                     | 0                                 | 0                                               | 0                                  | 0.81                                 |
| 28     | 0                     | 0                                 | 0                                               | 0                                  | 0.93                                 |
| 29     | 0                     | 0                                 | 0                                               | 0                                  | 0.86                                 |

**Table S.2** The significance test and variance analysis of the regression model

| Source                            | Sum of squares     | Degrees of freedom | Mean square        | F-value | P-value  | Source |
|-----------------------------------|--------------------|--------------------|--------------------|---------|----------|--------|
| Model                             | 0.36               | 14                 | 0.026              | 8.23    | 0.0002   | *      |
| A Salinity                        | 0                  | 1                  | 0                  | 0       | 1        |        |
| B Ultrasonic time                 | $4.03 \times 10^3$ | 1                  | $4.03 \times 10^3$ | 1.28    | 0.2774   |        |
| C Mixed yeast addition            | 0.019              | 1                  | 0.019              | 6.08    | 0.0272   |        |
| D Temperature variation range     | 0.016              | 1                  | 0.016              | 5.11    | 0.0403   | *      |
| AB                                | $9.03 \times 10^3$ | 1                  | $9.03 \times 10^3$ | 2.86    | 0.113    |        |
| AC                                | $6.25 \times 10^4$ | 1                  | $6.25 \times 10^4$ | 0.2     | 0.6632   |        |
| AD                                | $4.00 \times 10^4$ | 1                  | $4.00 \times 10^4$ | 0.13    | 0.7272   |        |
| BC                                | $1.23 \times 10^3$ | 1                  | $1.23 \times 10^3$ | 0.39    | 0.5434   |        |
| BD                                | $1.60 \times 10^3$ | 1                  | $1.60 \times 10^3$ | 0.51    | 0.4882   |        |
| CD                                | $1.60 \times 10^3$ | 1                  | $1.60 \times 10^3$ | 0.51    | 0.4882   |        |
| A <sup>2</sup>                    | 0.13               | 1                  | 0.13               | 41.28   | < 0.0001 | **     |
| B <sup>2</sup>                    | 0.092              | 1                  | 0.092              | 29.21   | < 0.0001 | **     |
| C <sup>2</sup>                    | 0.12               | 1                  | 0.12               | 38.42   | < 0.0001 | **     |
| D <sup>2</sup>                    | 0.14               | 1                  | 0.14               | 44.24   | < 0.0001 | **     |
| Residual                          | 0.044              | 14                 | $3.16 \times 10^3$ |         |          |        |
| Lack of Fit                       | 0.031              | 10                 | $3.13 \times 10^3$ | 0.97    | 0.5630   |        |
| Pure Error                        | 0.013              | 4                  | $3.23 \times 10^3$ |         |          |        |
| Cor Total                         | 0.41               | 28                 |                    |         |          |        |
| $R^2=0.8917$ , $R^2_{Adj}=0.7834$ |                    |                    |                    |         |          |        |

Note: Blank, no significant difference; \* Significant difference  $P < 0.05$ ; \*\* the difference was highly significant  $P < 0.01$ .

**Table S.3** Determination of organic acid content in three soy sauces

| Organic acid<br>(mg/mL) | SR                       | LS                       | HS                       |
|-------------------------|--------------------------|--------------------------|--------------------------|
| Oxalate                 | 2.67±0.13 <sup>b</sup>   | 3.43±0.17 <sup>a</sup>   | 2.87±0.14 <sup>b</sup>   |
| Tartaric acid           | 0.05±0.0025 <sup>c</sup> | 0.08±0.0048 <sup>a</sup> | 0.10±0.0054 <sup>a</sup> |
| Formic acid             | 0.16±0.013 <sup>a</sup>  | 0.11±0.0051 <sup>b</sup> | 0.16±0.0080 <sup>a</sup> |
| Malic acid              | 0.12±0.0060 <sup>a</sup> | 0.09±0.0045 <sup>b</sup> | 0.13±0.0065 <sup>a</sup> |
| Lactic acid             | 0.17±0.0085 <sup>a</sup> | 0.06±0.0035 <sup>c</sup> | 0.13±0.0065 <sup>b</sup> |
| Acetic acid             | 2.88±0.14 <sup>b</sup>   | 2.14±0.11 <sup>c</sup>   | 3.01±0.15 <sup>a</sup>   |
| Citric acid             | 0.59±0.030 <sup>b</sup>  | 0.59±0.033 <sup>b</sup>  | 0.69±0.042 <sup>a</sup>  |
| Fumaric acid            | ND                       | ND                       | ND                       |
| Succinic acid           | 0.16±0.0081 <sup>a</sup> | 0.04±0.0024 <sup>c</sup> | 0.11±0.0055 <sup>b</sup> |
| Propionic acid          | 2.15±0.11 <sup>a</sup>   | 2.07±0.10 <sup>b</sup>   | 2.16±0.16 <sup>a</sup>   |
| Total                   | 8.95±0.69 <sup>a</sup>   | 8.61±0.38 <sup>b</sup>   | 9.36±0.43 <sup>a</sup>   |

\*: "ND" means not detected. Different letters within the same row indicate significant differences ( $p < 0.05$ ).

**Table S.4 Substances included in the three groups of GC-MS results and their relative content.**

| Component                            | SR           | LS           | HS           |
|--------------------------------------|--------------|--------------|--------------|
| ethanol                              | 12.62        | 9.28         | 10.53        |
| 2-methyl-1-butanol                   | 6.5          | 3.64         | 5.45         |
| 3-methyl-1-butanol                   | 9.34         | 6.51         | 8.83         |
| 1-pentanol                           | ND*          | ND           | 2.63         |
| 2,3-butanediol                       | 12.83        | 6.49         | 8.22         |
| furfuryl alcohol                     | 4.57         | 2.39         | 3.48         |
| hexyl alcohol                        | ND           | ND           | 1.69         |
| 5-methyl-2-furanmethanol             | 1.69         | 1.88         | 1.27         |
| 1-heptanol                           | ND           | ND           | 1.62         |
| 3-methylthiopropanol                 | 2.65         | 2.33         | 2.99         |
| 1-octen-3-ol                         | ND           | ND           | 2.88         |
| 5-methyl-5-nonanol                   | ND           | 2.52         | ND           |
| 3,5-dimethyl-hexane-1,3,4-triol      | ND           | 3.81         | 0.82         |
| 1-octanol                            | ND           | 1.66         | ND           |
| phenylethyl alcohol                  | 2.27         | 1.04         | 2.65         |
| <b>Relative content of alcohols</b>  | <b>52.47</b> | <b>38.85</b> | <b>53.06</b> |
| <b>Number of alcohols</b>            | <b>8</b>     | <b>11</b>    | <b>12</b>    |
| acetic acid                          | 18.66        | 15.37        | 16.59        |
| isobutyric acid                      | 3.51         | 4.67         | 4.38         |
| isovaleric acid                      | 6.32         | 8.86         | 8.21         |
| 2-methylbutyric acid                 | ND           | 6.23         | ND           |
| 4-methylvaleric acid                 | ND           | 4.89         | ND           |
| heptanoic acid                       | ND           | ND           | 1.99         |
| octanoic acid                        | 3.42         | ND           | ND           |
| palmitic acid                        | 8.68         | 9.24         | 7.35         |
| <b>Relative content of acids</b>     | <b>40.59</b> | <b>49.26</b> | <b>38.52</b> |
| <b>Number of acids</b>               | <b>5</b>     | <b>6</b>     | <b>5</b>     |
| isobutyraldehyde                     | 1.52         | 0.68         | 1.74         |
| isobutyralbegyde                     | 4.7          | 2.22         | 4.26         |
| tiglic aldehyde                      | ND           | ND           | 0.23         |
| furfural                             | 1.19         | 0.34         | 1.66         |
| heptaldehyde                         | ND           | ND           | 0.29         |
| methional                            | ND           | ND           | 0.14         |
| benzaldehyde                         | 2.87         | 1.52         | 2.91         |
| benzeneacetaldehyde                  | 3.45         | 1.16         | 3.68         |
| 1-nonanal                            | ND           | 1.01         | ND           |
| decanal                              | ND           | 0.37         | ND           |
| 2,4-dimethylbenzaldehyde             | ND           | 0.5          | ND           |
| <b>Relative content of aldehydes</b> | <b>13.73</b> | <b>7.8</b>   | <b>14.91</b> |

|                                      |       |       |       |
|--------------------------------------|-------|-------|-------|
| <b>Number of aldehydes</b>           | 5     | 8     | 8     |
| methyl acetate                       | 3.81  | ND    | 3.56  |
| isobutyl acetate                     | ND    | 2.46  | ND    |
| isoamyl acetate                      | 1.93  | 1.95  | 2.12  |
| 2-methylbutyl acetate                | 0.86  | ND    | ND    |
| 4-hydroxybutyric acid                | 1.05  | 1.14  | ND    |
| methyl hexanoate                     | 3.75  | ND    | 3.64  |
| vinyl hexanoate                      | 0.69  | ND    | ND    |
| methyl benzoate                      | 0.94  | ND    | ND    |
| phenethyl acetate                    | 3.64  | 2.2   | 4.86  |
| methyl hexadecanoate                 | ND    | 2.18  | ND    |
| ethyl palmitate                      | 2.09  | ND    | 3.68  |
| methyl linoleate                     | 3.38  | 2.63  | 3.57  |
| <b>Relative content of esters</b>    | 22.14 | 12.56 | 21.43 |
| <b>Number of esters</b>              | 11    | 6     | 6     |
| 2,3-pentanedione                     | 3.89  | ND    | 5.38  |
| 3-octanone                           | ND    | ND    | 5.86  |
| 2,3-octanedione                      | 4.61  | 3.98  | ND    |
| 2,5-dimethyl-3-hexanone              | ND    | 2.74  | ND    |
| <b>Relative content of ketones</b>   | 8.50  | 6.72  | 11.24 |
| <b>Number of ketones</b>             | 2     | 2     | 2     |
| guaiacol                             | 7.16  | ND    | 6.82  |
| 4-hydroxy-3-methoxystyrene           | ND    | 4.93  | ND    |
| <b>Relative phenols content</b>      | 7.16  | 4.93  | 6.82  |
| <b>Number of phenols</b>             | 1     | 1     | 1     |
| 2,5-dimethylfuran                    | 1.06  | 0.82  | 0.86  |
| 2-pentylfuran                        | 1.05  | ND    | ND    |
| <b>Relative content of furans</b>    | 2.11  | 0.82  | 0.86  |
| <b>Number of furans</b>              | 2     | 1     | 1     |
| 2,6-dimethylpyrazine                 | 1.85  | 1.54  | 1.62  |
| 2,3,5-trimethylpyrazine              | 1.76  | ND    | 0.63  |
| <b>Relative content of pyrazines</b> | 3.61  | 1.54  | 2.25  |
| <b>Number of pyrazines</b>           | 2     | 1     | 2     |
| 2-acetyl pyrrole                     | 1.22  | ND    | 0.74  |
| <b>Relative content of pyrroles</b>  | 1.22  | ND    | 0.74  |
| <b>Number of pyrroles</b>            | 1     | 0     | 1     |

\*: "ND" means not detected.
